# Supplementary material for: OsHrd3 is necessary for maintaining the quality of endoplasmic reticulum-derived protein bodies in rice endosperm
Source: PubMed Central journal article supplement (PMC4507767; doi:10.1093/jxb/erv229), 2015-05-14
Supplement: supp_erv229_jexbot145243_file001.pdf [file supp_erv229_jexbot145243_file001.pdf]

**Supplemental data**

**OsHrd3 is necessary for maintaining the quality of ER-derived protein bodies in rice endosperm**

Masaru Ohta and Fumio Takaiwa\*

**\*Corresponding author:** Fumio Takaiwa

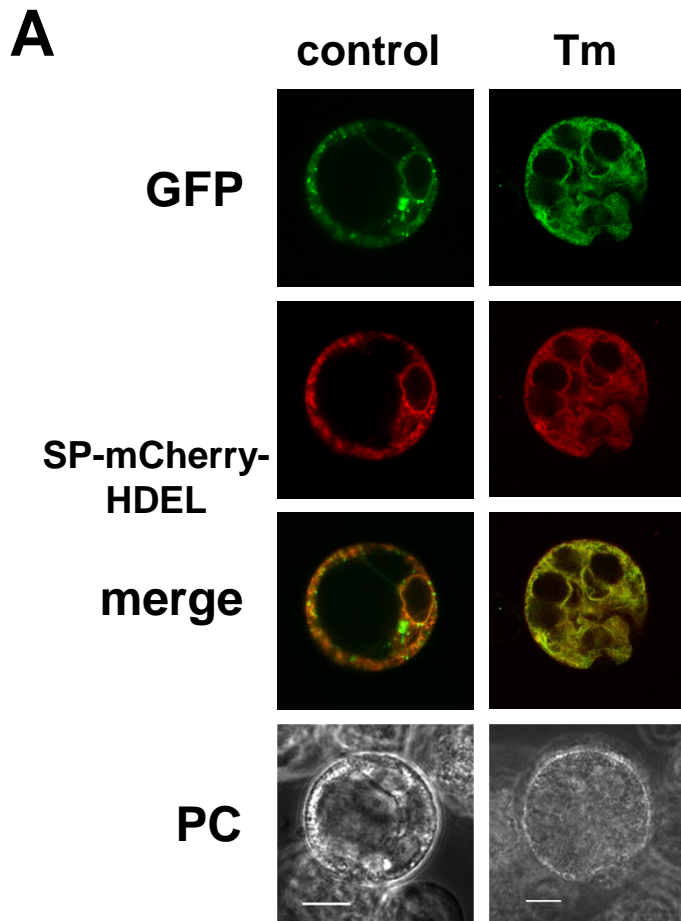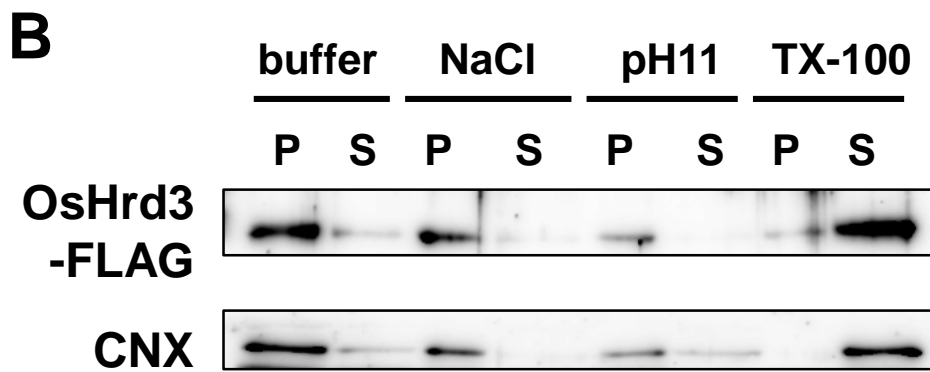

Fig. S1.

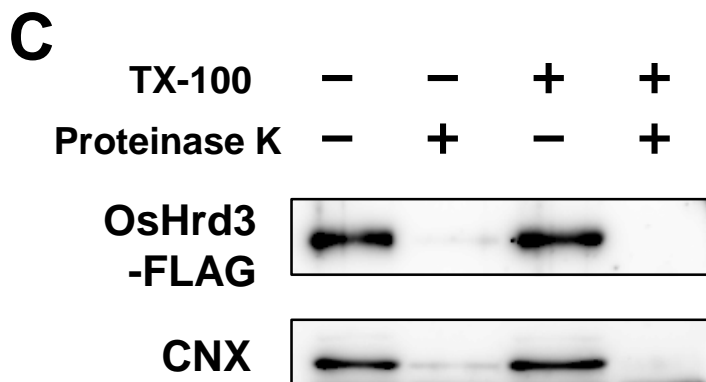

**Fig. S1.** Sub-cellular localization and membrane topology of OsHrd3 in rice protoplasts.

(A) OsHrd3-GFP fusion protein co-localizes with an ER-marker protein in protoplasts. An ER-localized mCherry (SP-mCherry-HDEL) fusion construct was transiently co-transfected with OsHrd3-GFP in rice protoplasts prepared from rice suspension culture cells (Oc cells). After 18 h of incubation, the protoplasts were treated with 0.1% DMSO (control) or 5  $\mu\text{g mL}^{-1}$  tunicamycin (Tm) for an additional 6 h. The cells were observed and photographed with a confocal laser-scanning microscope. Bar = 10  $\mu\text{m}$ . (B) Analysis of microsomal fraction from rice protoplasts expressing *OsHrd3-FLAG* tag fusion proteins. The microsomal fraction was suspended in control buffer, high salt buffer (1M NaCl), alkaline buffer (100 mM Na<sub>2</sub>CO<sub>3</sub>, pH 11), and Triton X-100 buffer (1% Triton X-100). These suspensions were ultracentrifuged to obtain the pellet (P) and supernatant (S) fractions. Each fraction was subjected to immunoblot analysis with anti-FLAG-HRP conjugated or anti-calnexin (CNX) antibodies. (C) Protease treatment of the microsomal fraction from rice protoplasts expressing *OsHrd3-FLAG*.

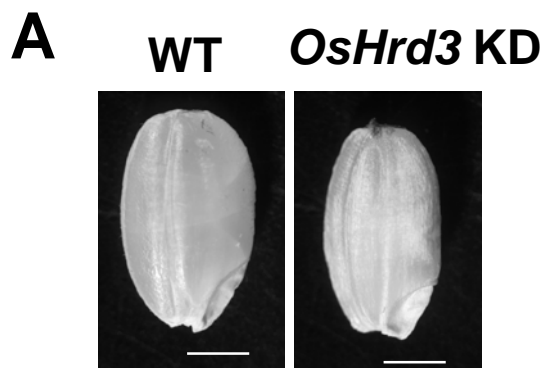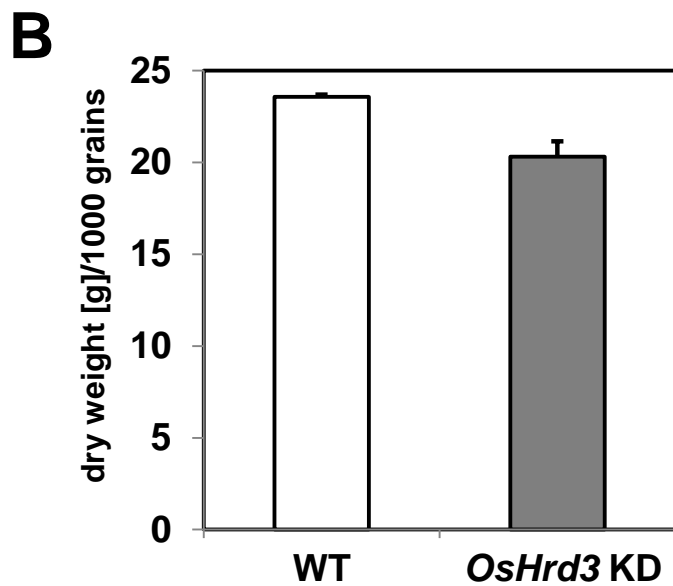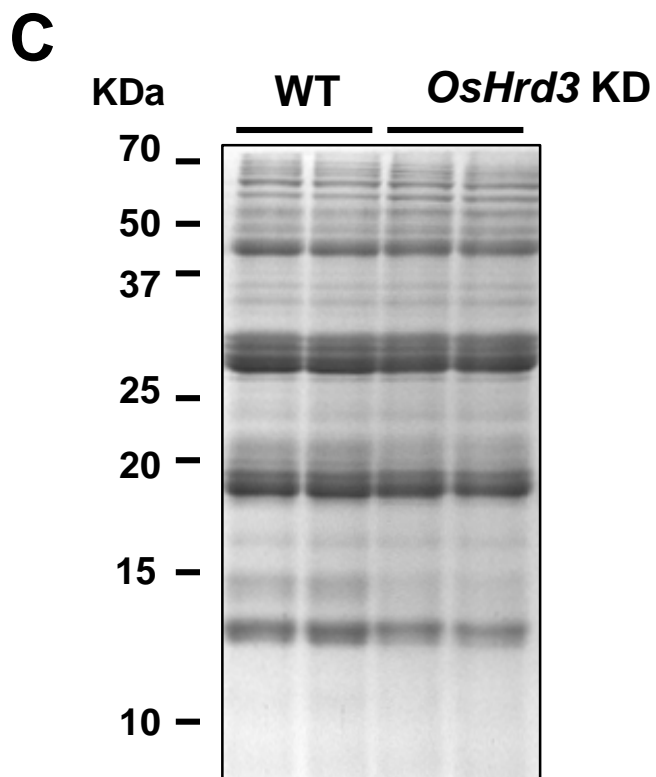

Fig. S2.

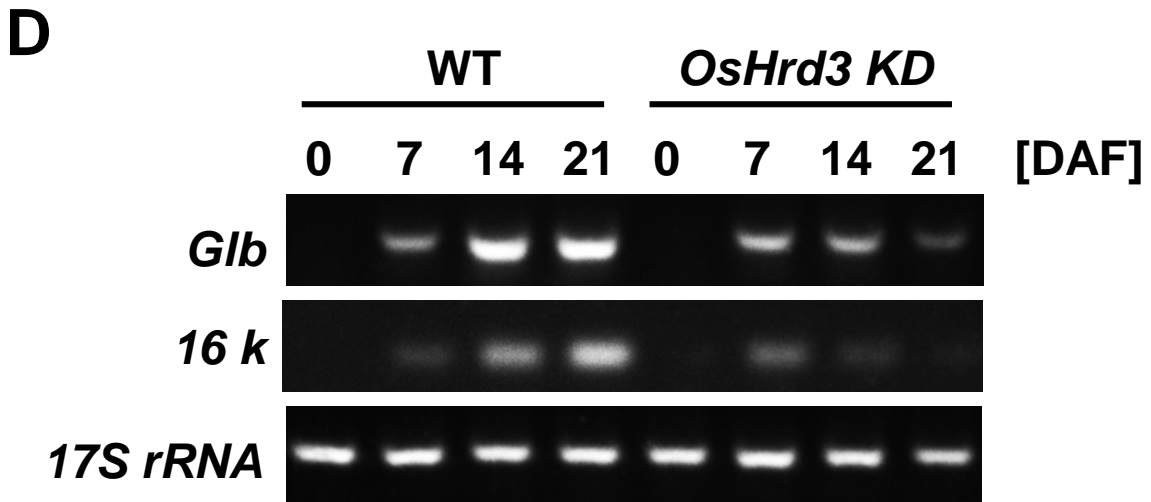

**Fig. S2.** *OsHrd3* KD seeds show unfolded protein responses. (A) Phenotypes of wild-type (WT) and *OsHrd3* KD seeds. Bar = 2 mm. (B) Dry weight (g/1000 seeds) of mature wild-type and *OsHrd3* KD seeds. Error bars represent SD from three replicates harvested different years. (C) SDS-PAGE analysis of total proteins extracted from mature WT and *OsHrd3* KD seeds. Total proteins were extracted from mature seeds with SDS-urea buffer containing 2-ME. The total proteins were separated by SDS-PAGE, followed by immunoblot analyses using antibodies against ER-resident chaperones. (D) RT-PCR analysis of the transcript levels of genes encoding 26 kDa globulin (*Glb*) and Cys-rich 16 kDa prolamin (16 k). Total RNAs were isolated from seed tissues at 0, 7, 14 and 21 DAF. 17S rRNA was analyzed as a loading control.

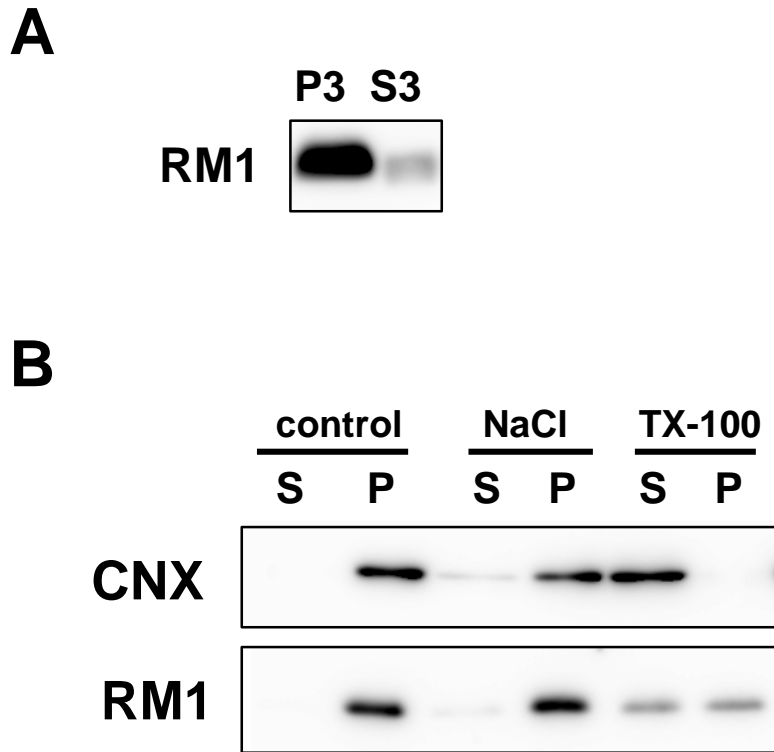

**Fig. S3.** Fractionation of RM1 from maturing seeds. (A) Some RM1 was present in the S3 fraction. Total homogenates from wild-type 14 DAF seeds were centrifuged at 3,000 g to fractionate them into the supernatant (S3) and pellet (P3). (B) The S3 fraction was subsequently centrifuged at 100,000 g under the following conditions: control buffer, a buffer containing 1 M NaCl buffer, or 1% Triton X-100 (TX-100). The supernatant (S) and pellet (P) fractions were separated by SDS-PAGE, followed by immunoblot analyses using antibodies against CNX and RM1.

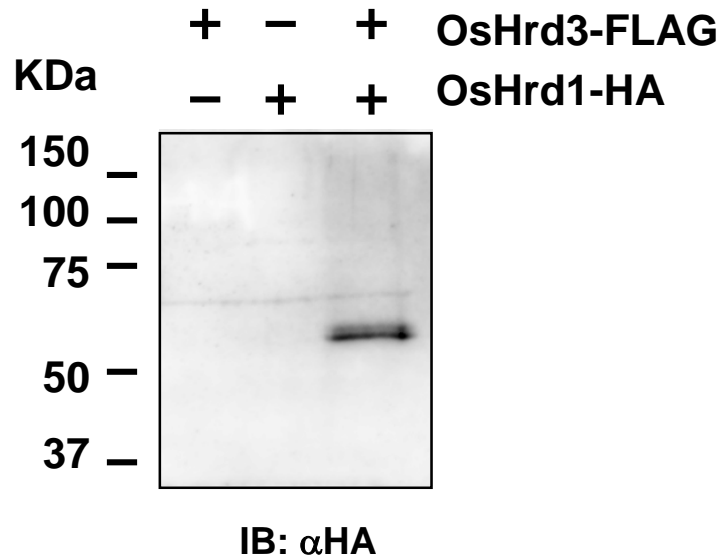

**Fig. S4.** OsHrd3 is necessary for the accumulation of OsHrd1. Protoplasts expressing OsHrd1-HA and/or OsHrd3-FLAG were extracted with SDS loading buffer. The total proteins were separated by SDS-PAGE, followed by immunoblot analyses using anti-HA-HRP conjugated antibody.

**Table S1. Primers used for plasmid construction and RT-PCR analysis**

| Plasmid construction   |         |                                                                   |
|------------------------|---------|-------------------------------------------------------------------|
| Construct name         | primer  | sequence                                                          |
| OsHrd3-GFP             | Hrd3-9  | 5'-TAACCCGGGATGCAGAACAGGCGGCGATCTC-3'                             |
|                        | Hrd3-10 | 5'-GTTGCCCGGGCATGGGTGCACCATCAGGCTG-3'                             |
| Ubip-2xHA-GluBter HA-3 |         | 5'-<br>GCGGGTACCTACCCATACGACGTTCCAGACTACGCTGGTTA<br>CCCATACGAC-3' |
|                        | HA-4    | 5'-<br>CTGGAGCTCAACCGGATCTAGCGTAGTCTGGAACGTCGTA<br>TGGGTAACC-3'   |
| OsHrd1-HA              | Hrd1-3  | 5'-GAATGGTACCATGATTGCGCTGCAGACGTACG-3'                            |
|                        | Hrd1-4  | 5'-GAATGGTACCGTCGCTTTTGTGTGCTCACC-3'                              |
| OsOS9-HA               | OS9-3   | 5'-GTCGCCGACCATGGGGCTCGCCG-3'                                     |
|                        | OS9-4   | 5'-AATGATGCATACCATGGTAGCATAAGCTG-3'                               |
| OsEDEM1-HA             | EDEM1-1 | 5'-GAGCATGCCACCTCGGGCCCGAC-3'                                     |
|                        | EDEM1-2 | 5'-CCTTGATCCGGTCAGGTATCTTCTTCGGTCG-3'                             |
| OsHrd3-RNAi            | Hrd3-1  | 5'-TGCTCTAGAGCTTGCACTAACAAGTTTATGG-3'                             |
|                        | Hrd3-2  | 5'-TGCTCTAGAAGTATACGTTTTTCTTGAACAAC-3'                            |
|                        | Hrd3-3  | 5'-AGAGGATCCGCTTGCACTAACAAGTTTATGG-3'                             |
|                        | Hrd3-4  | 5'-AGAGGATCCAGTATACGTTTTTCTTGAACAAC-3'                            |
| RT-PCR                 |         |                                                                   |
| Gene name              | primer  | sequence                                                          |
| OsHrd3                 | Hrd3-7  | 5'-TTCTCAGCCATATCATAACCATC-3'                                     |
|                        | Hrd3-8  | 5'-GGAGAGCTATCATTTTAAACCC-3'                                      |
| Glb                    | Glb-1   | 5'-TCGTCGGAGGAGGGCTACTAC-3'                                       |
|                        | Glb-2   | 5'-ATCTCGTTGCATGCAACACAG-3'                                       |
| 16 k                   | 16K-3   | 5'-ATGGCGCAACAATATCATTGC-3'                                       |
|                        | 16K-2   | 5'-ATGGTACACACTACCAAGAAC-3'                                       |
